# Supplementary material for: Identification of Ovarian Cancer Metastatic miRNAs
Source: PLoS One. 2013 Mar 12;8(3):e58226. doi: 10.1371/journal.pone.0058226 (PMC3595263; doi:10.1371/journal.pone.0058226)
Supplement: Table S1 — Summary of Patient Characteristics. (XLSX) [file pone.0058226.s009.xlsx]

## Sheet: Sheet1
Case	WIOC ID	Pathology	Primary Site	Stage	Debulk Status
1	21	high grade serous	ovary	IIIc	suboptimal
2	23	Papillary serous, synchronous	ovary/uterus	IIIc	optimal
3	27	high grade mullerian transitional (likely variant of serous)	ovary	IIIc	optimal
4	28	high grade serous	ovary	IIIc	suboptimal
5	29	high grade serous	ovary	IIIc	optimal
6	30	high grade serous	fallopian tube	IIIc	suboptimal
7	31	high grade serous	ovary	IIIc	optimal
8	32	high grade serous	fallopian tube	IIIc	suboptimal
9	33	high grade serous	ovary	IIIc	suboptimal
